# Supplementary material for: Community-Acquired Antimicrobial Resistant Enterobacteriaceae in Central America: A One Health Systematic Review
Source: PubMed Central journal article supplement (PMC7589814; doi:10.3390/ijerph17207622), 2020-10-19
Supplement: ijerph-17-07622-s001.pdf [file ijerph-17-07622-s001.pdf]

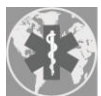

**Supplementary Material:**

Literature search details

PubMed search was conducted February 10, 2020 with the following terms:

("antimicrobia\*" OR "antibiotico" OR "antibiotic" OR "antibiotics" OR "anti-microbia\*" OR "anti-biotic\*" OR "antimicrobial drug resistance"[MeSH] OR "drug resistance, microbial"[MeSH] OR "anti-bacterial agents"[MeSH] OR "extended spectrum" OR "ESBL" OR "carbapenem" OR "colistin" OR "MRSA" OR "methicillin resistant" AND ("Central America" OR "Guatemala" OR "Panama" OR "Nicaragua" OR "Honduras" OR "Costa Rica" OR "El Salvador" OR "Belize"))

**Table S1.** Characteristics of Central American Countries.

| Country     | Population <sup>a</sup> | Life Expectancy <sup>b</sup> | Infant Mortality <sup>c</sup> | Basic Water Access <sup>d</sup> | Basic Sanitation Access <sup>e</sup> | Gross National Income (GNI) <sup>f</sup> | Income Classification <sup>g</sup> |
|-------------|-------------------------|------------------------------|-------------------------------|---------------------------------|--------------------------------------|------------------------------------------|------------------------------------|
| Belize      | 0.390                   | 74.5                         | 11.2                          | 98                              | 88                                   | 4,450                                    | Upper Middle                       |
| Costa Rica  | 5.05                    | 80.1                         | 7.6                           | >99                             | 98                                   | 11,700                                   | Upper Middle                       |
| El Salvador | 6.45                    | 73.1                         | 11.8                          | 97                              | 87                                   | 4,000                                    | Lower Middle                       |
| Guatemala   | 16.6                    | 74.1                         | 22.1                          | 94                              | 65                                   | 4,610                                    | Upper Middle                       |
| Honduras    | 9.75                    | 75.1                         | 15.1                          | 95                              | 81                                   | 2,390                                    | Lower Middle                       |
| Nicaragua   | 6.55                    | 74.3                         | 15.7                          | 82                              | 74                                   | 1,910                                    | Lower Middle                       |
| Panama      | 4.25                    | 78.3                         | 13.1                          | 96                              | 83                                   | 14,950                                   | High                               |

<sup>a</sup> In millions, World Bank 2019 Indicator [1]; <sup>b</sup> At birth (years), World Bank 2018 Indicator [1]; <sup>c</sup> Per 1000 live births, World Bank 2018 Indicator [1].; <sup>d</sup> Percent of national population with access to improved water sources within 30 minutes round trip collection time, WHO/UNICEF Joint Monitoring Programme 2017 estimates [2]; <sup>e</sup> Percent of national population with access to improved sanitation facilities that are not shared with other households, WHO/UNICEF Joint Monitoring Programme 2017 estimates [2].; <sup>f</sup> Per capita using Atlas method (current US\$), World Bank 2019 Indicator [1].; <sup>g</sup> Income classification based on GNI per capita (current US\$) calculated using the Atlas method [3].

**Table S2.** Factors assessed in synthesis of extracted papers.

|                                                                                                                                                                                                                                                                                                                                 |                                                                                                                                                                                                                                                                                                                   |
|---------------------------------------------------------------------------------------------------------------------------------------------------------------------------------------------------------------------------------------------------------------------------------------------------------------------------------|-------------------------------------------------------------------------------------------------------------------------------------------------------------------------------------------------------------------------------------------------------------------------------------------------------------------|
| <ul style="list-style-type: none"> <li>● Authors</li> <li>● Year published</li> <li>● Journal</li> <li>● Data collection timeframe</li> <li>● Study Title</li> <li>● Country</li> <li>● Urban or Rural location</li> <li>● Specimen type (human/animal)</li> <li>● Animal type</li> <li>● Sample size (human/animal)</li> </ul> | <ul style="list-style-type: none"> <li>● Study design</li> <li>● Species studied</li> <li>● Types of resistance studied</li> <li>● Antibiotic used</li> <li>● Molecular methods</li> <li>● Epidemiological methods (to determine risk)</li> <li>● Laboratory method for typing</li> <li>● Key findings</li> </ul> |
|---------------------------------------------------------------------------------------------------------------------------------------------------------------------------------------------------------------------------------------------------------------------------------------------------------------------------------|-------------------------------------------------------------------------------------------------------------------------------------------------------------------------------------------------------------------------------------------------------------------------------------------------------------------|

**Table S3.** Brief description of included studies on CA-ARE in Central America <sup>a</sup>.

| Authors                         | Location and/or Country   | Sample Source and Size                                                         | Bacterial Species Studied                               | Phenotypic Resistance Studied <sup>b</sup>                                                        |
|---------------------------------|---------------------------|--------------------------------------------------------------------------------|---------------------------------------------------------|---------------------------------------------------------------------------------------------------|
| Shears et al. 1988 [4]          | San Pedro, Belize         | Children w/ diarrhea ( <i>n</i> = 9)                                           | Enterobacteriaceae                                      | Amp, Chl, Str, Sul, Tet, Tmp                                                                      |
| Williams et al. 2003 [5]        | San José, Costa Rica      | Adults w/ urinary tract infection (unspecified <i>n</i> )                      | <i>Escherichia coli</i>                                 | Cip, Nit, Sxt                                                                                     |
| Rodríguez et al. 2006 [6]       | Costa Rica (2 cities)     | Lettuce ( <i>n</i> = 30)                                                       | Enterobacteriaceae                                      | Gen, Otc                                                                                          |
| Pérez et al. 2010 [7]           | Costa Rica                | Children w/ diarrhea ( <i>n</i> = 173)                                         | <i>Escherichia coli</i>                                 | Amc, Amp, Car, Cfz, Cro, Cxm, Cef, Cip, Gen, Lvx, Min, Nal, Nit, Nor, Tim, Tob, Sxt               |
| Jiménez et al. 2015 [8]         | Costa Rica                | Asian house geckos ( <i>n</i> = 115)                                           | <i>Salmonella</i> spp.                                  | Amp, Ctx, Caz, Chl, Cip, Nal, Nit, Pip, Ptz, Str, Sul, Tet, Sxt                                   |
| Molina et al. 2016 [9]          | Costa Rica                | Animal feed ( <i>n</i> = 1725)                                                 | <i>Salmonella</i> spp.                                  | Tet                                                                                               |
| Baldi et al. 2019 [10]          | Costa Rica (3 cities)     | Raccoons ( <i>n</i> = 86)                                                      | <i>Salmonella</i> spp.                                  | Cip, Nal                                                                                          |
| Pérez-Corrales et al. 2019 [11] | San José, Costa Rica      | Children w/ diarrhea ( <i>n</i> = 12247)                                       | <i>Escherichia coli</i>                                 | Amp, Cip, Sxt                                                                                     |
| Pehrsson et al. 2016 [12]       | El Salvador               | Adults & children ( <i>n</i> = 115)<br>Environmental samples ( <i>n</i> = 209) | Not applicable (resistome-based study)                  | Amo, Pen, Pip, Ptz, Fox, Ctx, Caz, Fep, Mem, Atm, Chl, Tet, Tgc, Gent, Cip, Col, Nit              |
| Mata et al. 1970 [13]           | Guatemala                 | Adults & children w/ & w/o diarrhea ( <i>n</i> = 403)                          | <i>Shigella dysenteriae</i> ,<br><i>Salmonella</i> spp. | Amp, Cef, Chl, Col, Ery, Gen, Kan, Nal, Neo, Nit, Pen, Str, Sul, Tet                              |
| Pasteran et al. 2012 [14]       | Guatemala City, Guatemala | Adult ( <i>n</i> = 1)<br>Child ( <i>n</i> = 1)                                 | <i>Klebsiella pneumoniae</i>                            | Sxt, Min, Cip, Gen, Chl, Amk, Nal, Lvx, Tgc, Col, Fof, metallo-lactamase production, beta-lactams |
| Jarquín et al. 2015 [15]        | Guatemala                 | Poultry products ( <i>n</i> = 300)                                             | <i>Salmonella</i> spp.                                  | Amp, Amc, Cft, Chl, Cro, Enr, Gen, Str, Tet, Sxt                                                  |

|                            |                     |                                                                                       |                                                                                                                |                                                                                                                   |
|----------------------------|---------------------|---------------------------------------------------------------------------------------|----------------------------------------------------------------------------------------------------------------|-------------------------------------------------------------------------------------------------------------------|
| Villegas et al. 2016 [16]  | Guatemala           | Adults w/ blood stream infection ( <i>n</i> = 20) <sup>c</sup>                        | Enterobacteriaceae                                                                                             | Carbapenems (carbapenemase-production)                                                                            |
| Liebana et al. 2004 [17]   | Comayagua, Honduras | Child ( <i>n</i> = 1)                                                                 | <i>Salmonella enterica</i>                                                                                     | Amk, Amp, Amc, Atm, Cft, Cxm, Caz, Ctx, Cro, Cfp, Fox, Cpd, Chl, Cls, Fur, Gen, Ipm, Nal, Neo, Str, Sxt, Tet, Tss |
| Mayatepek et al. 1993 [18] | Estelí, Nicaragua   | Children w/ diarrhea ( <i>n</i> = 50)<br>Children w/o diarrhea ( <i>n</i> = 50)       | <i>Escherichia coli</i>                                                                                        | Amp, Chl, Col, Gen, Kan, Tet, Sxt                                                                                 |
| Matute et al. 2004 [19]    | León, Nicaragua     | Adults w/ urinary tract infection ( <i>n</i> = 208)                                   | <i>E. coli</i> , <i>Klebsiella</i> spp., <i>Enterobacter</i> spp.                                              | Amo, Amc, Cro, Caz, Cip, Cef, Gen, Mem, Nit, Nor, Sxt                                                             |
| Bours et al. 2010 [20]     | León, Nicaragua     | Adults w/ urinary tract infection ( <i>n</i> = 304)                                   | <i>E. coli</i> , <i>Serratia</i> spp., <i>E. fergusonii</i> , <i>Enterobacter</i> spp., <i>Klebsiella</i> spp. | Amk, Amp, Amc, Cef, Cro, Cip, Gen, Nit, Sxt                                                                       |
| Amaya et al. 2011 [21]     | León, Nicaragua     | Children w/ diarrhea ( <i>n</i> = 511)<br>Children w/o ( <i>n</i> = 215)              | <i>Escherichia coli</i>                                                                                        | Amp, Amc, Caz, Cro, Chl, Cip, Gen, Ipm, Sxt                                                                       |
| Amaya et al. 2012 [22]     | León, Nicaragua     | Sewage & well-water ( <i>n</i> = 118)                                                 | <i>Escherichia coli</i>                                                                                        | Amp, Amc, Ctx, Caz, Cro, Cip, Chl, Gen, Nal, Sxt                                                                  |
| Hasan et al. 2016 [23]     | León, Nicaragua     | Poultry ( <i>n</i> = 100)<br>Wild birds ( <i>n</i> = 100)<br>Humans ( <i>n</i> = 100) | <i>E. coli</i> , <i>Klebsiella pneumoniae</i>                                                                  | Cephalosporins                                                                                                    |

<sup>a</sup> Information only relevant to Central America, results from isolates outside this geographic scope in the same article were excluded. <sup>b</sup> Antimicrobial abbreviations: Amc = amoxicillin-clavulanic acid, Amk = amikacin, Amo = amoxicillin, Amp = ampicillin, Atm = aztreonam, Car = carbenicillin, Caz = ceftazidime, Cef = cephalothin, Chl = chloramphenicol, Cfp = cefoperazone, Cft = ceftiofur, Cfx = cefazolin, Cls = colistin sulfate, Cpd = cefpodoxime, Cro = ceftriaxone, Col = colistin, Ctx = cefotaxime, Cxm = cefuroxime, Enr = enrofloxacin, Ery = erythromycin, Fep = cefepime, Fof = fosfomicin, Fox = ceftiofur, Fur = furazolidone, Gen = gentamicin, Ipm = imipenem, Kan = kanamycin, Lvx = levofloxacin, Mem = meropenem, Min = minocycline, Nal = nalidixic acid, Neo = neomycin, Nor = norfloxacin, Nit = nitrofurantoin, Otc = oxytetracycline, Pen = penicillin, Pip = piperacillin, Ptz = piperacillin-tazobactam, Str = streptomycin, Sul = sulfathiazole, Sxt = trimethoprim-sulfamethoxazole, Tet = tetracycline, Tgc = tigecycline, Tim = ticarcillin-clavulanic acid, Tmp = trimethoprim, Tob = tobramycin, Tss = triple-sulfonamide solution. <sup>c</sup> Blood stream infections studied had bacteremia sources from community-acquired and hospital-acquired infections, but country specific data did not differentiate between bacteremia sources.

## References

- World Development Indicators | DataBank. Available online: <https://databank.worldbank.org/source/world-development-indicators> (accessed on 23 June 2020).
- Progress on Household Drinking Water, Sanitation and Hygiene 2000–2017. In *Special Focus on Inequalities*; United Nations Children's Fund (UNICEF) and World Health Organization: New York, NY, USA, 2019. Available online: [https://www.who.int/water\\_sanitation\\_health/publications/jmp-2019-full-report.pdf](https://www.who.int/water_sanitation_health/publications/jmp-2019-full-report.pdf) (accessed on 16 October 2020).
- New Country Classifications by Income Level: 2019–2020. Available online: <https://blogs.worldbank.org/opendata/new-country-classifications-income-level-2019-2020> (accessed on 10 August 2020).
- Shears P, Hart CA, Suliman G. A preliminary investigation of antibiotic resistance in Enterobacteriaceae isolated from children with diarrhoea from four developing countries. *Ann Trop Med Parasitol.* 1988;82: 185–188.

5. Williams DN, Sannes MR, Eckhoff AA, Peterson PK, Johnson JR, Sannes MR, et al. Antimicrobial resistance in *Escherichia coli* causing urinary tract infections in Costa Rica: a clinical dilemma. *Int J Antimicrob Agents*. 2003; 79–81.
6. Rodríguez C, Lang L, Wang A, Altendorf K, García F, Lipski A. Lettuce for Human Consumption Collected in Costa Rica Contains Complex Communities of Culturable Oxytetracycline- and Gentamicin-Resistant Bacteria. *Appl Environ Microbiol*. 2006;72: 5870–5876.
7. Pérez C, Gómez-Duarte OG, Arias ML. Diarrheagenic *Escherichia coli* in children from Costa Rica. *Am J Trop Med Hyg*. 2010;83: 292–297.
8. Jiménez RR, Barquero-Calvo E, Abarca JG, Porras LP. *Salmonella* Isolates in the Introduced Asian House Gecko (*Hemidactylus frenatus*) with Emphasis on *Salmonella* Weltevreden, in Two Regions in Costa Rica. *Vector Borne Zoonotic Dis*. 2015;15: 550–555.
9. Molina A, Granados-Chinchilla F, Jiménez M, Acuña-Calvo MT, Alfaro M, Chavarría G. Vigilance for *Salmonella* in Feedstuffs Available in Costa Rica: Prevalence, Serotyping and Tetracycline Resistance of Isolates Obtained from 2009 to 2014. *Foodborne Pathog Dis*. 2016;13: 119–127.
10. Baldi M, Barquero Calvo E, Hutter SE, Walzer C. Salmonellosis detection and evidence of antibiotic resistance in an urban raccoon population in a highly populated area, Costa Rica. *Zoonoses Public Health*. 2019;66: 852–860.
11. Pérez-Corrales C, Leandro-Sandí K. Diarrheagenic *Escherichia coli* in Costa Rican children: a 9-year retrospective study. *BMC Res Notes*. 2019;12: 297.
12. Pehrsson EC, Tsukayama P, Patel S, Mejía-Bautista M, Sosa-Soto G, Navarrete KM, et al. Interconnected microbiomes and resistomes in low-income human habitats. *Nature*. 2016;533: 212–216.
13. Mata LJ, Gangarosa EJ, Cáceres A, Perera DR, Mejicanos ML. Epidemic Shiga bacillus dysentery in Central America. I. Etiologic investigations in Guatemala, 1969. *J Infect Dis*. 1970;122: 170–180.
14. Pasteran F, Albornoz E, Faccone D, Gomez S, Valenzuela C, Morales M, et al. Emergence of NDM-1-producing *Klebsiella pneumoniae* in Guatemala. *J Antimicrob Chemother*. 2012;67: 1795–1797.
15. Jarquin C, Alvarez D, Morales O, Morales AJ, López B, Donado P, et al. *Salmonella* on Raw Poultry in Retail Markets in Guatemala: Levels, Antibiotic Susceptibility, and Serovar Distribution. *J Food Prot*. 2015;78: 1642–1650.
16. Villegas MV, Pallares CJ, Escandón-Vargas K, Hernández-Gómez C, Correa A, Álvarez C, et al. Characterization and Clinical Impact of Bloodstream Infection Caused by Carbapenemase-Producing Enterobacteriaceae in Seven Latin American Countries. *PLoS One*. 2016;11: e0154092.
17. Liebana E, Batchelor M, Torres C, Briñas L, Lagos LA, Abdalhamid B, et al. Pediatric infection due to multiresistant *Salmonella enterica* serotype Infantis in Honduras. *J Clin Microbiol*. 2004;42: 4885–4888.
18. Mayatepek E, Seebass E, Hingst V, Kroeger A, Sonntag HG. Prevalence of enteropathogenic and enterotoxigenic *Escherichia coli* in children with and without diarrhoea in Esteli, Nicaragua. *J Diarrhoeal Dis Res*. 1993;11: 169–171.
19. Matute AJ, Hak E, Schurink CAM, McArthur A, Alonso E, Paniagua M, et al. Resistance of uropathogens in symptomatic urinary tract infections in León, Nicaragua. *Int J Antimicrob Agents*. 2004;23: 506–509.
20. Bours PHA, Polak R, Hoepelman AIM, Delgado E, Jarquin A, Matute AJ. Increasing resistance in community-acquired urinary tract infections in Latin America, five years after the implementation of national therapeutic guidelines. *Int J Infect Dis*. 2010;14: e770-4.
21. Amaya E, Reyes D, Vilchez S, Paniagua M, Möllby R, Nord CE, et al. Antibiotic resistance patterns of intestinal *Escherichia coli* isolates from Nicaraguan children. *J Med Microbiol*. 2011;60: 216–222.
22. Amaya E, Reyes D, Paniagua M, Calderón S, Rashid M-U, Colque P, et al. Antibiotic resistance patterns of *Escherichia coli* isolates from different aquatic environmental sources in León, Nicaragua. *Clin Microbiol Infect*. 2012;18: E347-54.
23. Hasan B, Laurell K, Rakib MM, Ahlstedt E, Hernandez J, Caceres M, et al. Fecal Carriage of Extended-Spectrum  $\beta$ -Lactamases in Healthy Humans, Poultry, and Wild Birds in León, Nicaragua—A Shared Pool of blaCTX-M Genes and Possible Interspecies Clonal Spread of Extended-Spectrum  $\beta$ -Lactamases-Producing *Escherichia coli*. *Microb Drug Resist*. 2016;22: 682–687.
